# Supplementary material
Source: PubMed Central journal article supplement (PMC5579358)

# Supplementary Figure S1

**A**

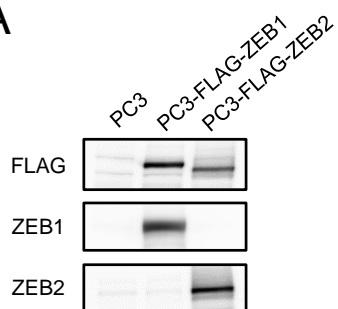

**B**

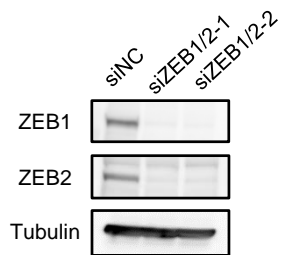

**C**

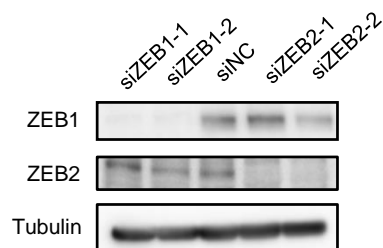

**D**

Result of GSEA: hallmarks

ZEB1 as activators

siZEB1-1

| NAME                             | NES  |
|----------------------------------|------|
| HALLMARK_INFLAMMATORY_RESPONSE   | 1.62 |
| HALLMARK_IL6_JAK_STAT3_SIGNALING | 1.57 |

siZEB1-2

| NAME                               | NES  |
|------------------------------------|------|
| HALLMARK_E2F_TARGETS               | 2.38 |
| HALLMARK_G2M_CHECKPOINT            | 2.37 |
| HALLMARK_MYC_TARGETS_V1            | 2.12 |
| INFLAMMATORY_RESPONSE              | 1.91 |
| HALLMARK_MTORC1_SIGNALING          | 1.90 |
| HALLMARK_MYC_TARGETS_V2            | 1.86 |
| HALLMARK_MITOTIC_SPINDLE           | 1.73 |
| HALLMARK_UNFOLDED_PROTEIN_RESPONSE | 1.66 |
| HALLMARK_ALLOGRAFT_REJECTION       | 1.52 |

ZEB2 as activators

siZEB2-1

| NAME                                       | NES  |
|--------------------------------------------|------|
| HALLMARK_INFLAMMATORY_RESPONSE             | 2.17 |
| HALLMARK_KRAS_SIGNALING_UP                 | 2.16 |
| HALLMARK_INTERFERON_ALPHA_RESPONSE         | 2.11 |
| HALLMARK_COAGULATION                       | 1.99 |
| HALLMARK_INTERFERON_GAMMA_RESPONSE         | 1.92 |
| HALLMARK_TNFA_SIGNALING_VIA_NFKB           | 1.90 |
| HALLMARK_EPITHELIAL_MESENCHYMAL_TRANSITION | 1.83 |
| HALLMARK_ANGIOGENESIS                      | 1.82 |
| HALLMARK_COMPLEMENT                        | 1.68 |
| HALLMARK_ALLOGRAFT_REJECTION               | 1.66 |
| HALLMARK_IL6_JAK_STAT3_SIGNALING           | 1.63 |

siZEB2-2

| NAME                           | NES  |
|--------------------------------|------|
| HALLMARK_KRAS_SIGNALING_UP     | 1.70 |
| ...                            | ...  |
| HALLMARK_INFLAMMATORY_RESPONSE | 1.34 |

**A**

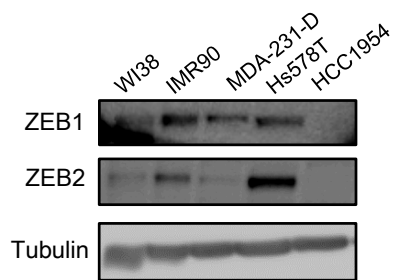

**B**

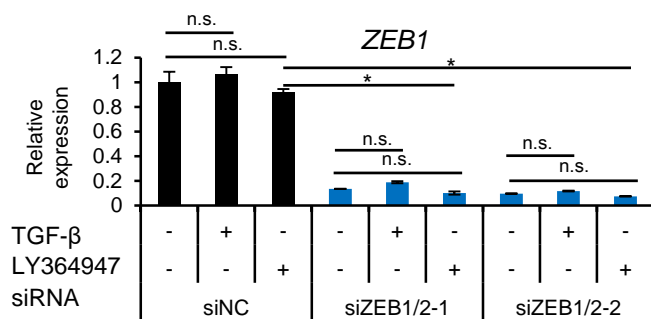

**C**

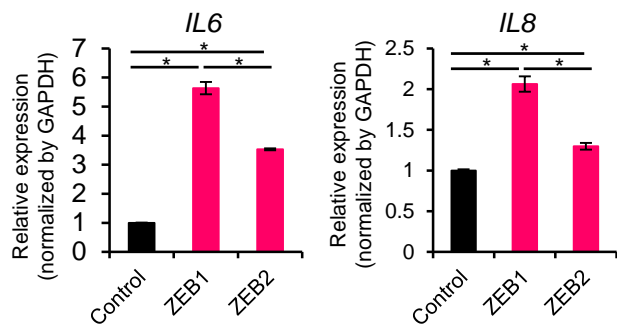

**D**

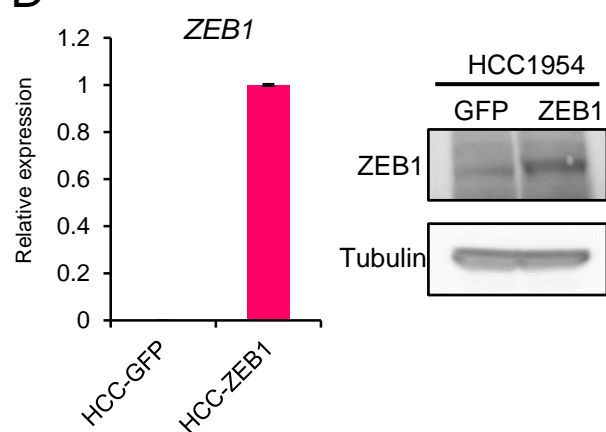

**E**

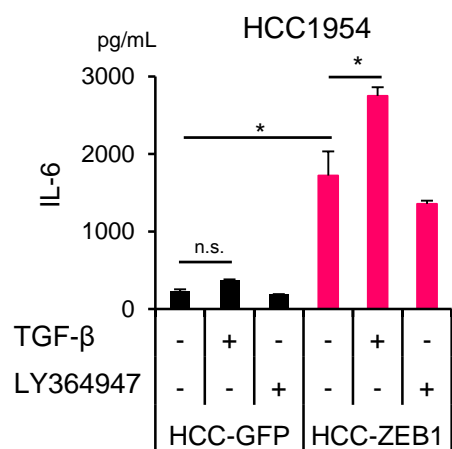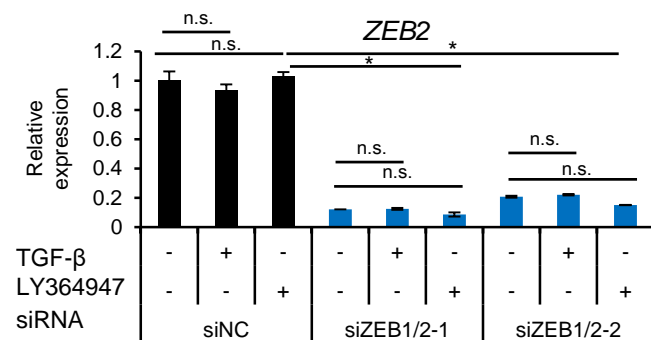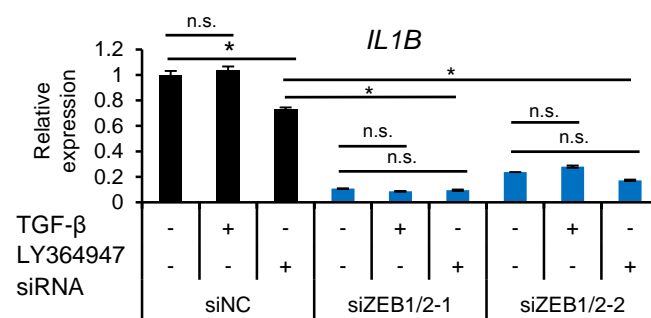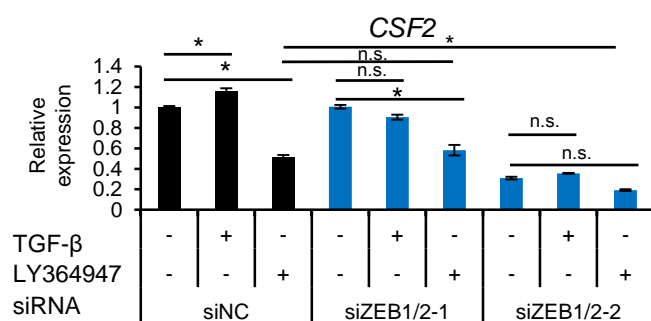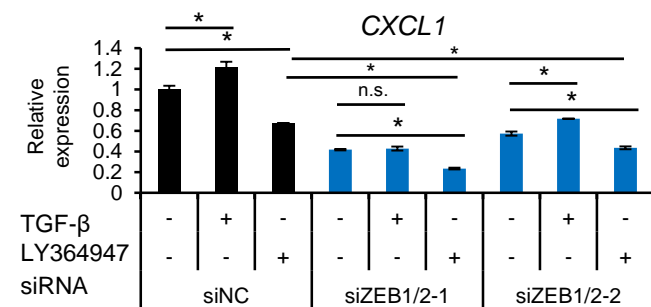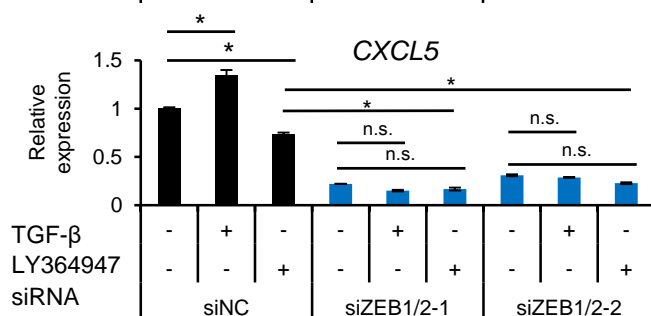

# Supplementary Figure S3

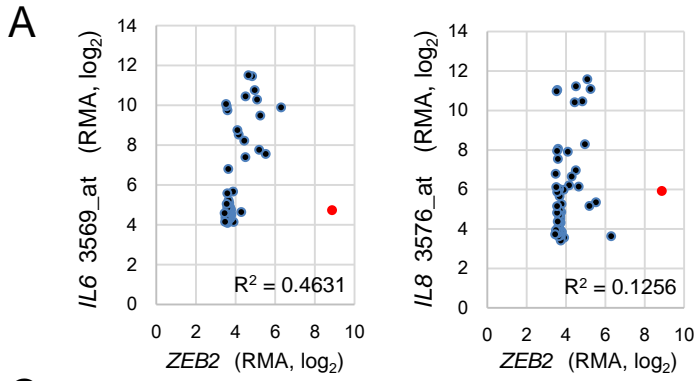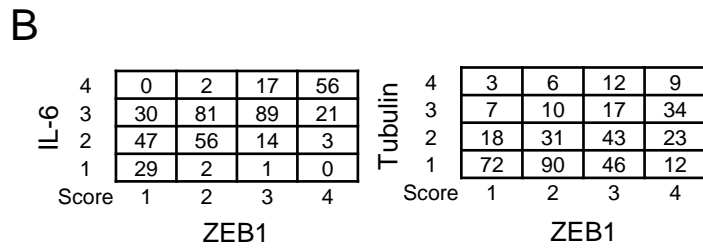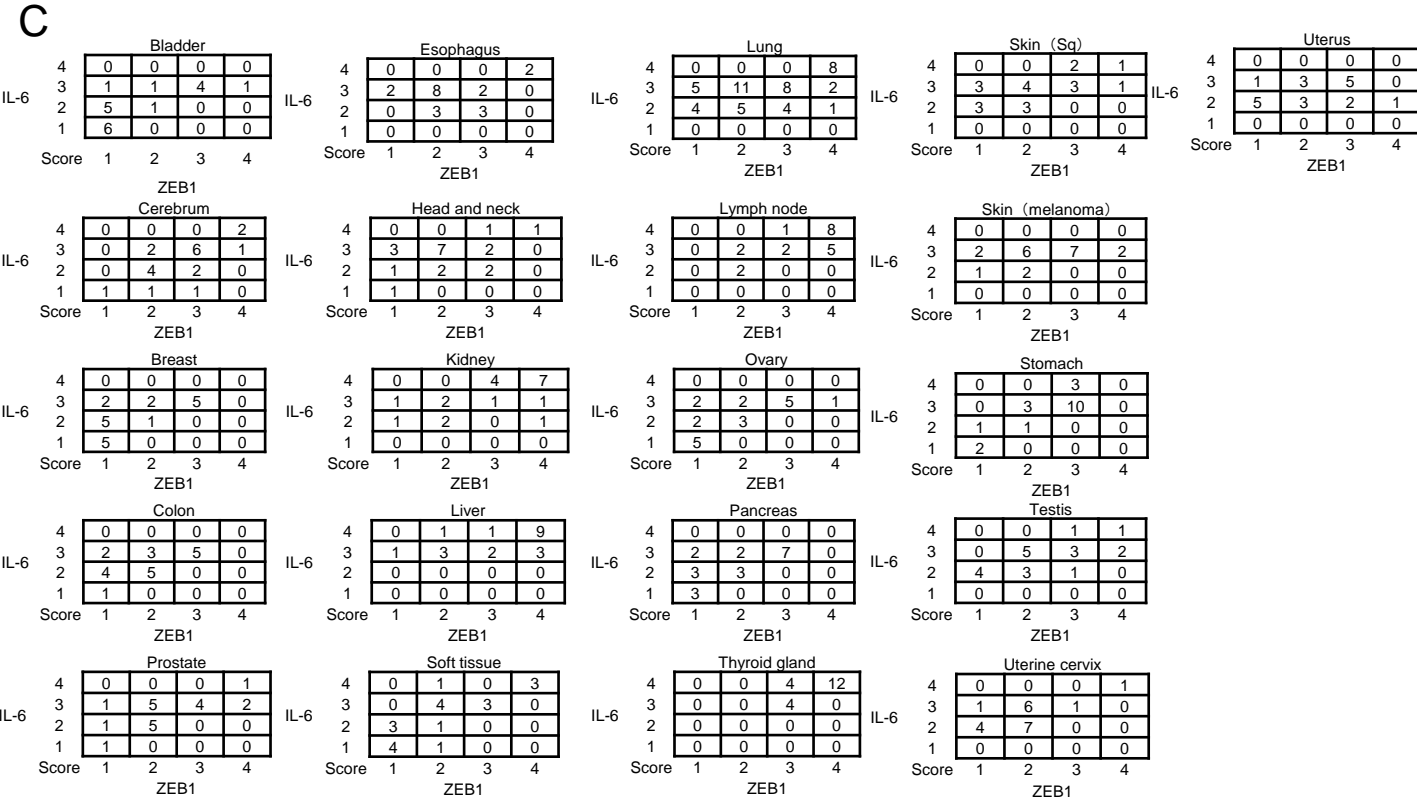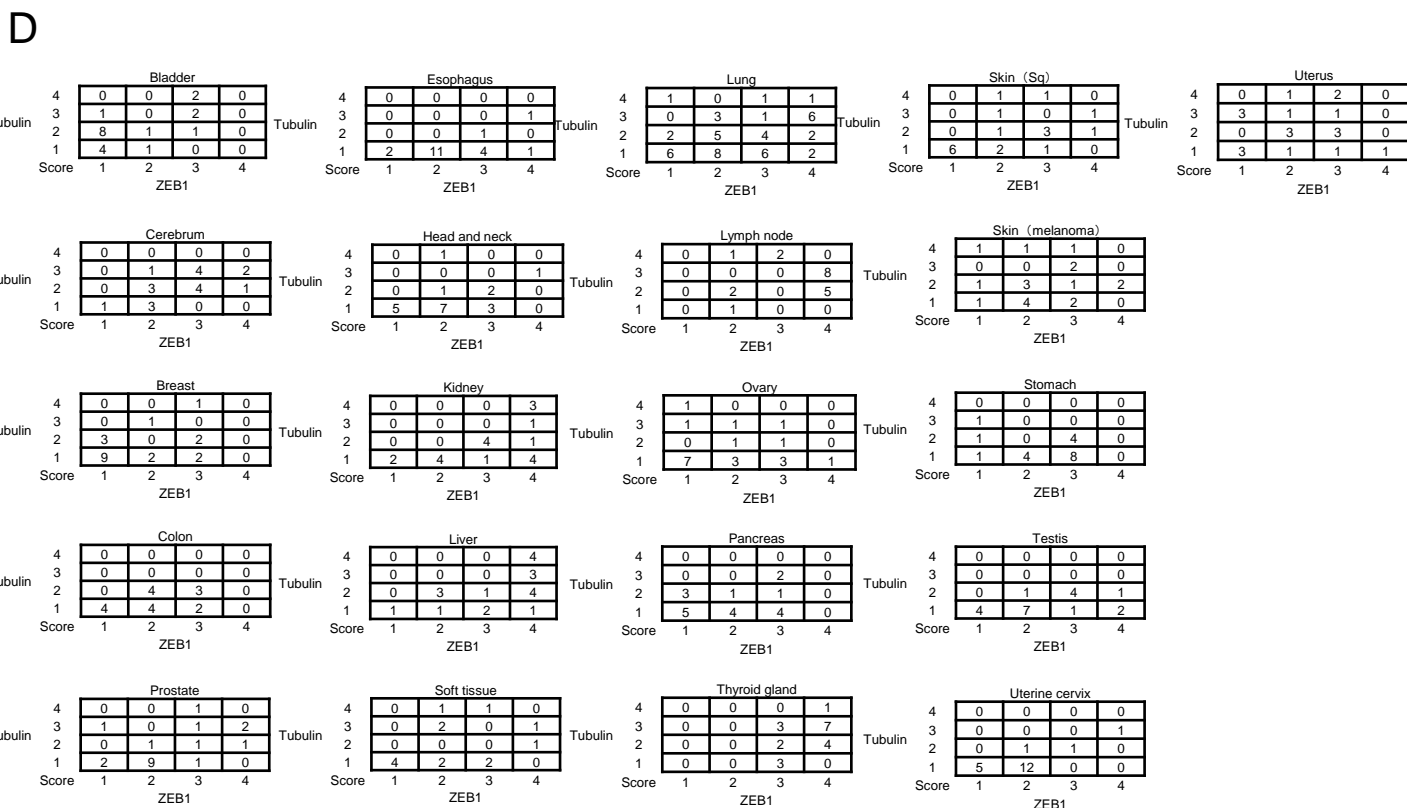

# Supplementary Figure S4

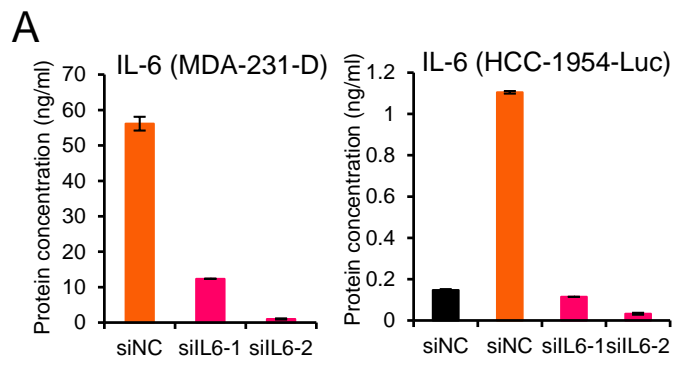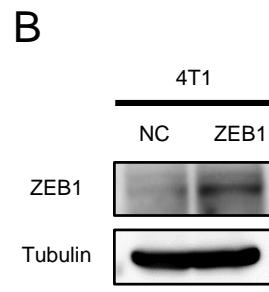

Supplement: MOL2-11-1241-s001.pdf [file MOL2-11-1241-s001.pdf]
